# Supplementary material for: One-pot manufacture of nanoparticle-based films in aqueous media via an electric field-driven assembly process
Source: Royal Society of Chemistry journal article supplement (doi:10.1039/c3gc42539h), 2014-01-01
Supplement: c3gc42539h1.pdf [file c3gc42539h1.pdf]

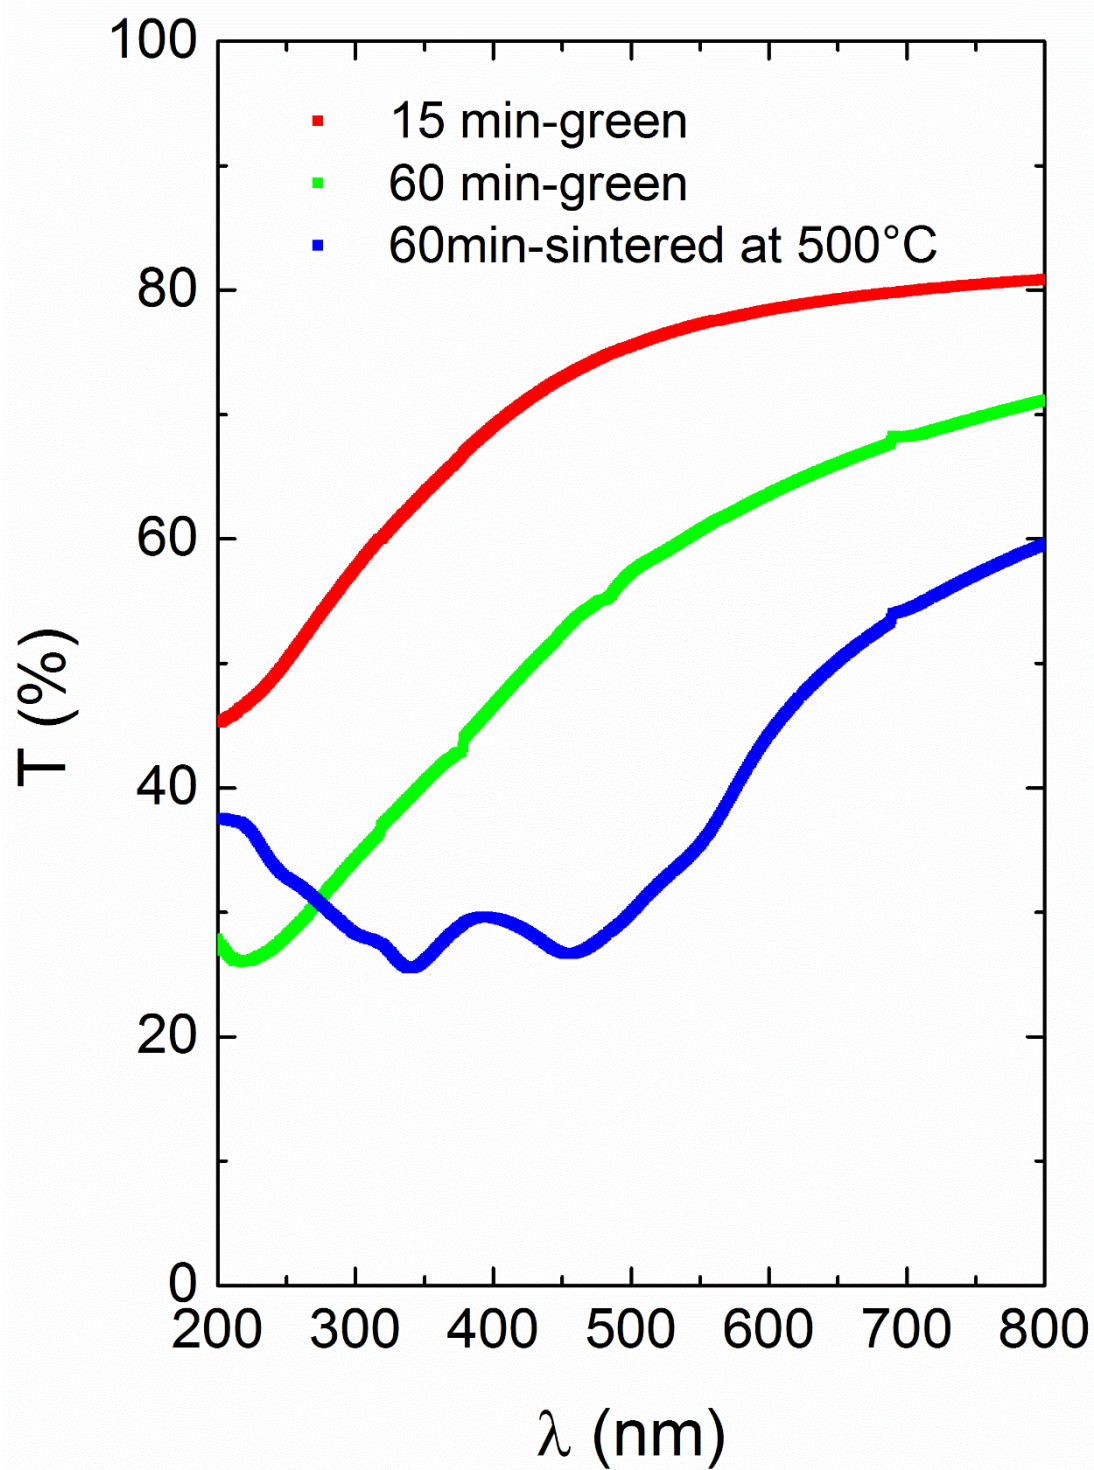

**Figure 12.** Transmittance spectra of the as- deposited films during 15 min (red squares) and 60min (green squares) the film annealed at 500° C after depositing during 60min (blue squares).

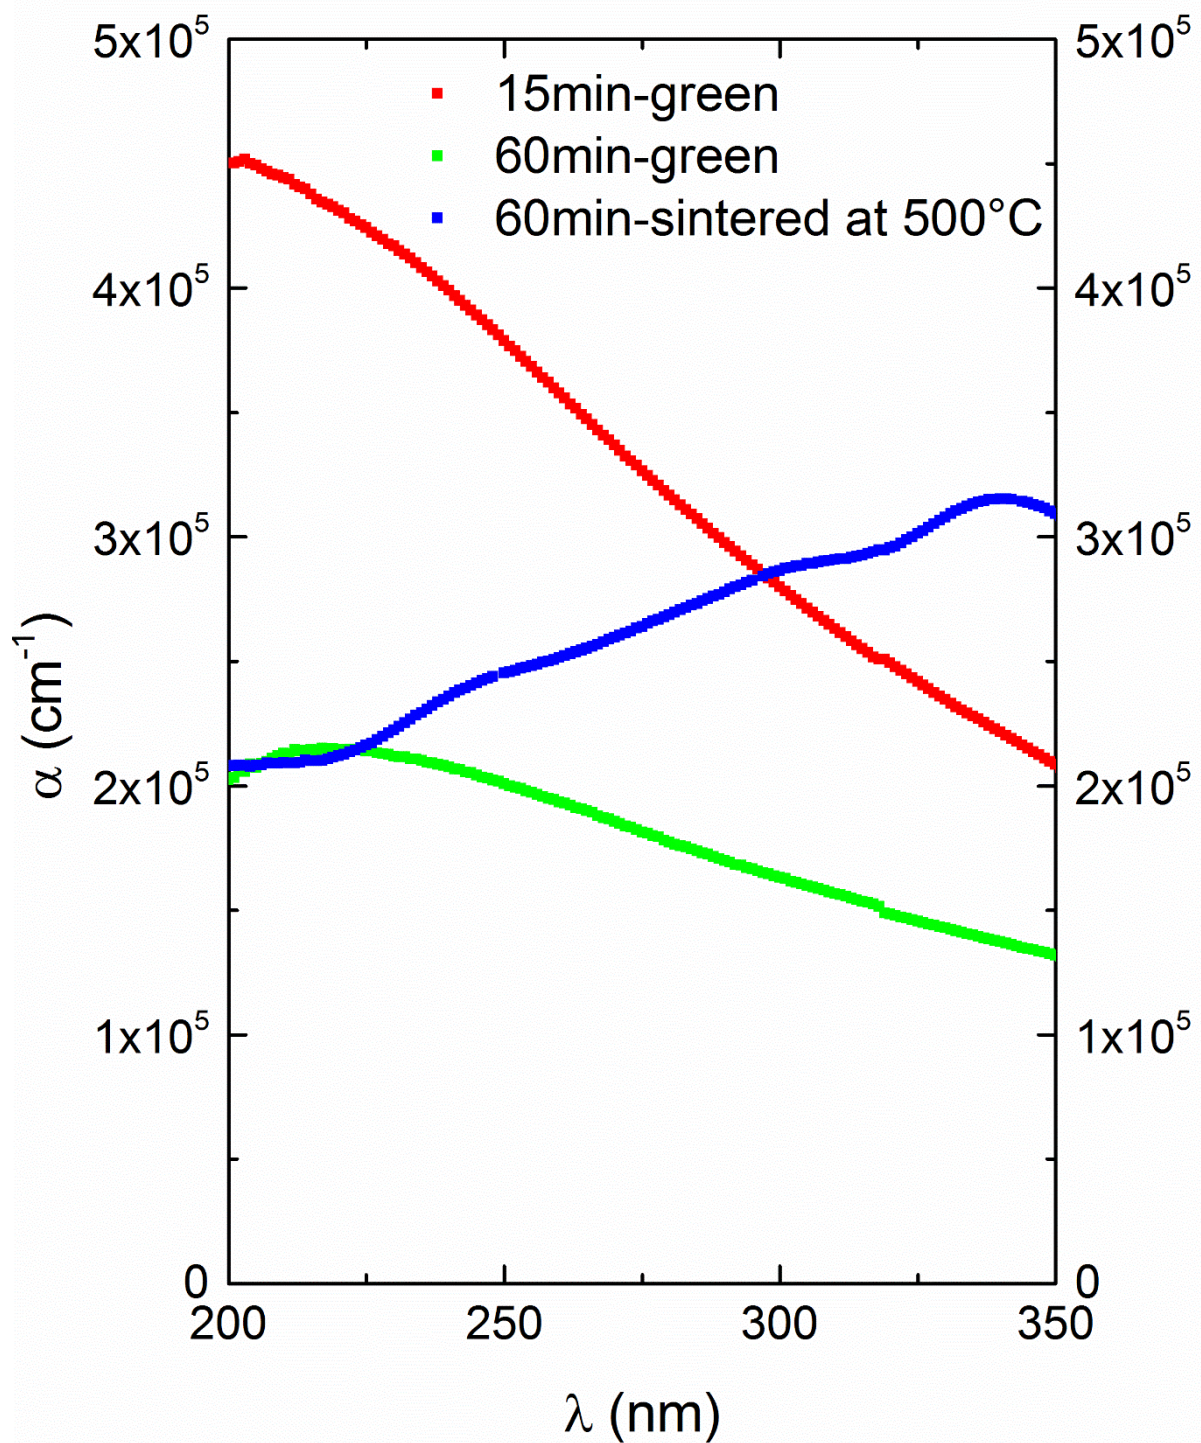

**Figure 13.** Linear optical absorption coefficients  $\alpha$  of the as-deposited films during 15 min (red squares) and 60min (green squares) the film annealed at 500°C after depositing during 60min (blue squares) as a function of the wavelength  $\lambda$ .

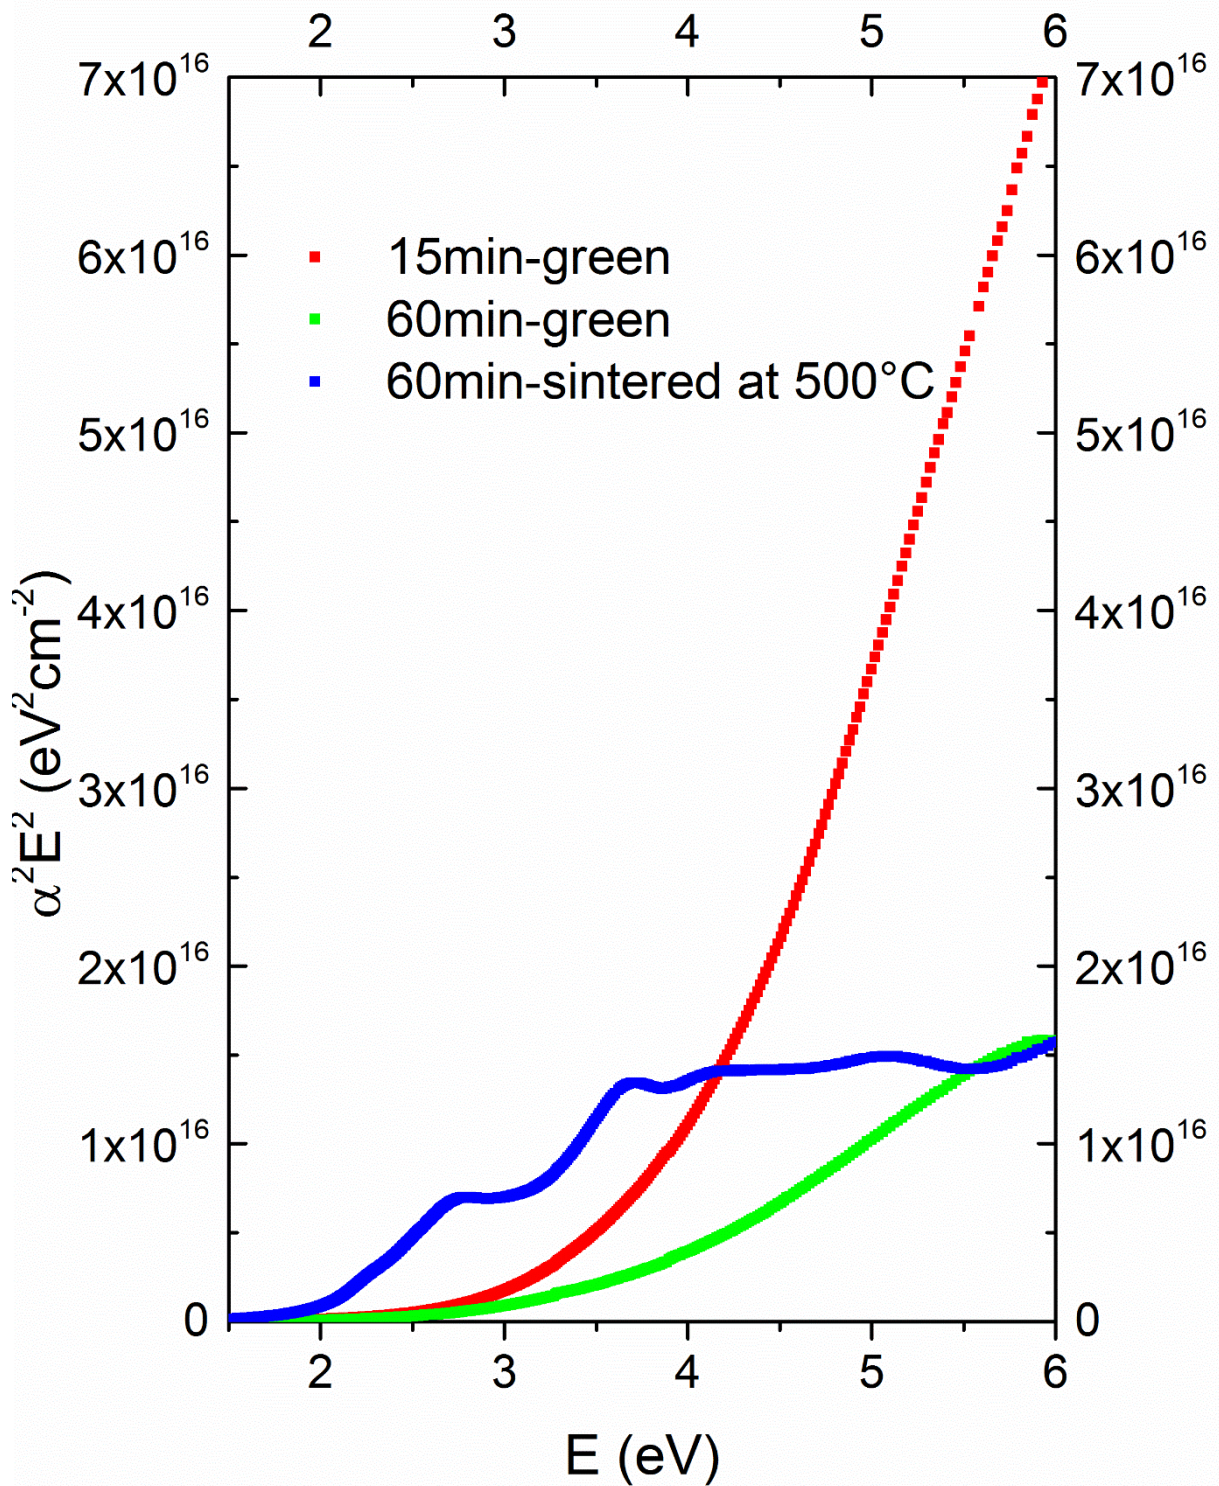

**Figure 14.** Plot of  $(\alpha h\nu)^2$  vs.  $h\nu$  for the as-deposited films during 15 min (red squares) and 60min (green squares) the film annealed at  $500^\circ\text{C}$  after depositing during 60min (blue squares). The optical band gap,  $E_g$ , is given by the intersection of the extrapolated linear section of the curve with the abscissa.
